# Supplementary material for: Solvent-templated supramolecular isomerism in 2D coordination polymer constructed by NiII2CoII nodes and dicyanamido spacers: drastic change in magnetic behaviours
Source: Royal Society of Chemistry journal article supplement (doi:10.1039/c3dt51326b), 2013-01-01

# Solvent-Templated Supramolecular Isomerism in 2D Coordination Polymer Constructed by Ni<sup>II</sup><sub>2</sub>Co<sup>II</sup> Node and Dicyanamido Spacer: Drastic Change in Magnetic Behaviors

Soumavo Ghosh,<sup>a</sup> Sandip Mukherjee,<sup>b</sup> Piya Seth,<sup>a</sup> Partha Sarathi Mukherjee\*<sup>b</sup> and Ashutosh Ghosh\*<sup>a</sup>

<sup>a</sup>Department of Chemistry, University College of Science, University of Calcutta, 92, A.P.C. Road, Kolkata-700 009, India; E-mail: [ghosh\\_59@yahoo.com](mailto:ghosh_59@yahoo.com)

<sup>b</sup>Department of Inorganic and Physical Chemistry, Indian Institute of Science, Bangalore-560 012, India; E-mail: [psm@ipc.iisc.ernet.in](mailto:psm@ipc.iisc.ernet.in)

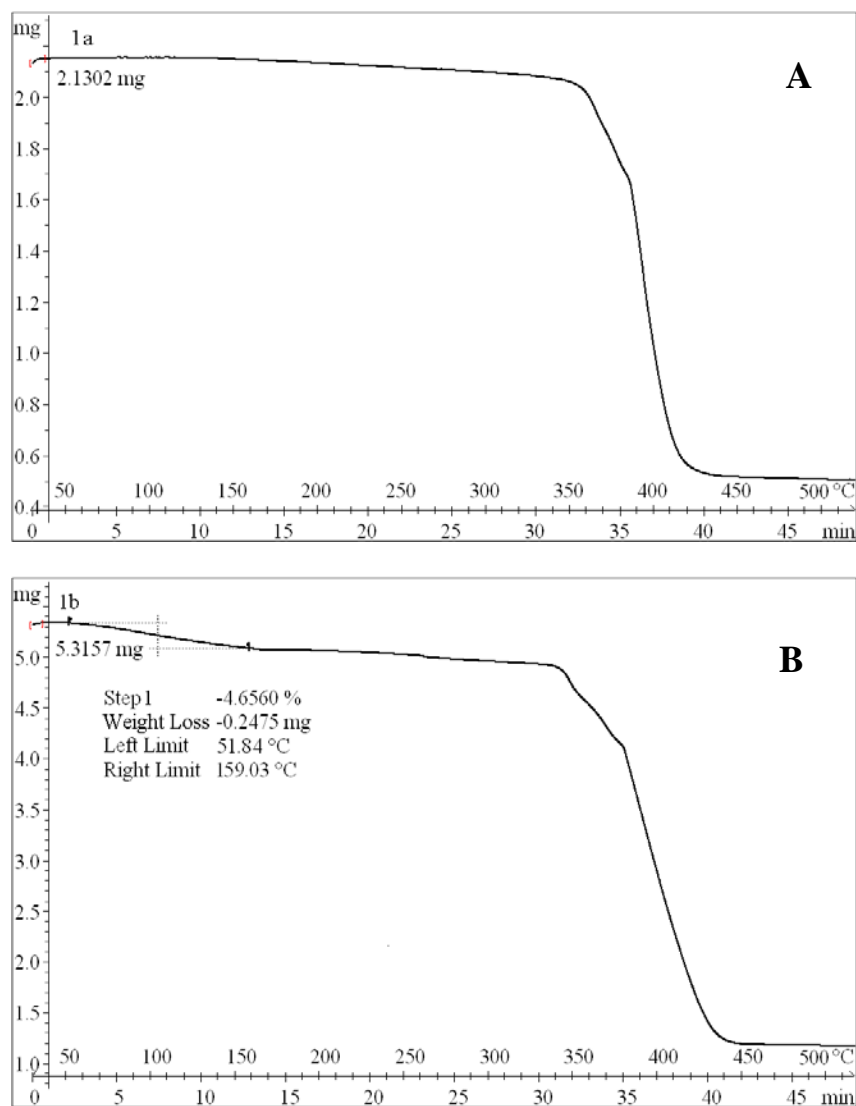

Figure S1 TGA curves of complexes 1a (S1A) and 1b (S1B).

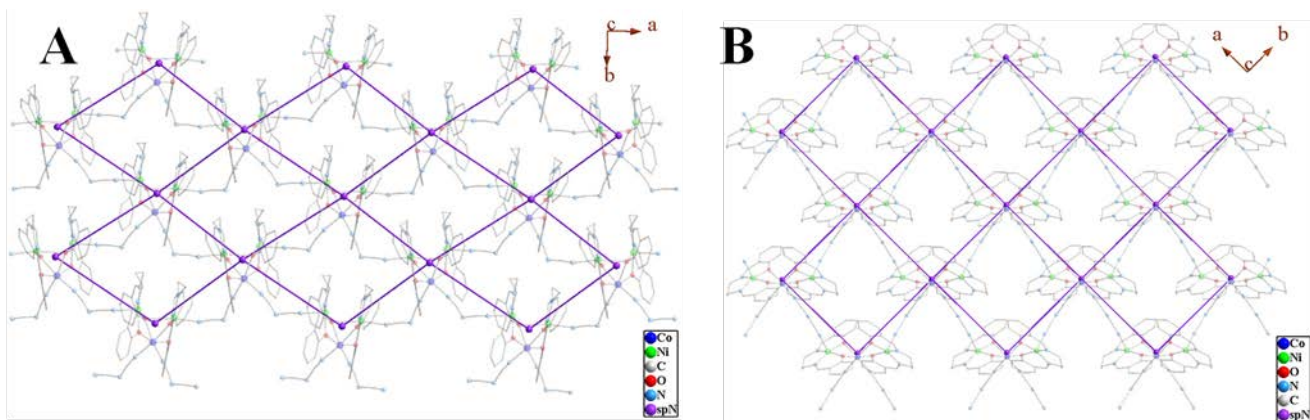

Supplement: c3dt51326b.pdf [file c3dt51326b.pdf]
